# Supplementary material for: Paradoxical design of a serendipitous pyrazolate bridging mode: a pragmatic strategy for inducing ineluctable ferromagnetic coupling
Source: Royal Society of Chemistry journal article supplement (doi:10.1039/d0dt02468f), 2020-01-01
Supplement: d0dt02468f1.pdf [file d0dt02468f1.pdf]

## Supporting Information

### **Paradoxical Design of A Serendipitous Pyrazolate Bridging Mode: A Pragmatic Strategy for Inducing Ineluctable Ferromagnetic Coupling.**

Manasi Roy, Arun K. Pal, Amit Adhikary, Ayan Datta\* and Raju Mondal\*

*School of Chemical Sciences, Indian Association for the Cultivation of Science, 2A & 2B Raja Subodh Chandra Mallick Rd, Jadavpur, Kolkata -700032, India*

#### **Contents:**

1. Experimental Procedures: Synthesis of ligand
2. **Table S1:** Crystallographic data and Refinement Parameters for Complex 1-5
3. **Table S2.** Selected hydrogen bonding distances (Å) and angles (deg) for the Complex 2.
4. **Table S3.** Selected hydrogen bonding distances (Å) and angles (deg) for the Complex 3.
5. **Table S4.** Selected hydrogen bonding distances (Å) and angles (deg) for the Complex 4.
6. **Table S5.** Selected hydrogen bonding distances (Å) and angles (deg) for the Complex 5.
7. **Table S6-S10.** Selected bond angle and bond length of Complex 2-5.
8. **Table S11:** The Cu-N<sub>axial</sub> distances and magnetic nature of complex 1-5
9. **Table S12:** Torsion angle (50°-120°) dependent magnetic exchange of copper compounds.
10. **Figure S1.** Structure of the all copper compounds having torsion angle in the range 50°-120° from CSD search.
11. **Figure S2-S6:** X-ray powder diffraction patterns of complex 1-5.
12. **Figure S7-S11:** Interatomic (Cu-Cu) distance and H-bonding pattern of complex 1-5.
13. **Figure S12-S16:** Representation of  $\pi$ - $\pi$  stacking of complex 1-5.
14. **Figure S17.** Computationally calculated molar magnetic susceptibility ( $\chi_M$ ) at different temperatures.
15. **Figure S18.** Spin density plots at broken symmetry state. The isovalues are of  $\pm 0.002$  a.u. Green refers the positive density while the yellow refers the negative density.
16. **Figure S19.** The singly occupied molecular orbitals (SOMOs) with isovalues of  $\pm 0.002$  a.u. The purple color indicates the positive sign whereas yellow color refers negative sign.

## Experimental Procedures:

### Material and general method

All reagents and chemicals except ligand were purchased from available commercial sources and were used without further purification. FT-IR spectra were obtained on a Nicolet MAGNA-IR 750 spectrometer with samples prepared as KBr pellets. C, H and N microanalyses were carried out with a 2400 Series-II CHN Analyzer, Perkin-Elmer, USA. Magnetic measurements were performed using a Quantum Design VSM SQUID magnetometer. The measured values were corrected for the experimentally measured contribution of the sample holder, while the derived susceptibilities were corrected for the diamagnetism of the samples, estimated from Pascal's tables.

**Synthesis of ethyl 4-(3-cyanophenyl)-2-hydroxy-4-oxobutanoate:** Potassium tert-butoxide (4.5 g, 40.10 mmol) was taken in dry diethyl ether (200 ml) at room temperature under N<sub>2</sub> atmosphere at stirring condition. Diethyl oxalate (4.4 ml, 30.10 mmol) was added to that solution. After 15 min of stirring, 3-acetylbenzotrile (4.35 g, 29.96 mmol) was added to the resulting mixture and the stirring was continuing for overnight. A light yellow precipitate was obtained and the whole resulting mixture is taken in a separating funnel. This solution was washed three times with 20 ml of water. The entire aqueous layer was collected in a beaker, cooled for some time and then dilute HCl (2 ml) was added to it dropwise until the whole solution became just acidic. A yellow precipitate was obtained which was filtered and product ethyl 4-(3-cyanophenyl)-2,4-dioxobutanoate was isolated as a yellow solid (3.3 g, 76.74 yield).

**Synthesis of ethyl 3-(3-cyanophenyl)-1H-pyrazole-5-carboxylate:** To a stirred ethanolic (40 ml) solution of ethyl 4-(3-cyanophenyl)-2,4-dioxobutanoate, hydrazine monohydrate (0.65 ml) was added drop wise. The resulting solution was stirred and refluxed for 24 h. The reaction mixture was allowed to cool to room temperature and the solvent was evaporated under reduced pressure. The residue was washed with water and recrystallized from methanol. 4-(3-cyanophenyl)-2,4-dioxobutanoate was obtained as a light yellow crystalline powder (3.44 gm)

### Synthesis of 3-(3-carboxyphenyl)-1H-pyrazole-5-carboxylic acid:

Dried 4-(3-cyanophenyl)-2,4-dioxobutanoate (3.44 g, 14.27 mmol) was added portion wise in a water solution of NaOH (880 mg, 22 mmol) under stirring condition and refluxed for overnight. A clear golden yellow solution was obtained; then the solution was filtered in a Whatman filter paper and cooled to room temperature. To this solution 6(N) HCl was added drop wise until the pH of the solution became just acidic. The off white precipitate was filtered and dried. The product thus obtained was recrystallized in methanol and the yield was 47.5% (with respect to 3-acetylbenzotrile).

<sup>1</sup>H NMR (DMSO-d<sub>6</sub>, 500 MHz): δ 13.7 (3H brs); 8.09 (3 H, d); 8.35 (3H, t); 7.82 (3H, d); 7.53 (3H, t); 6.5 (2H, d)

IR (400-4000 cm<sup>-1</sup>): 3604 (m); 3197 (br); 2917 (m); 1696 (s); 1515 (s); 1424 (s); 1289 (s)

HRMS: Calcd: 232.05, Found (M+Na): 255.07.

Elemental Analysis: Calcd; C: 56.90; N: 3.47; H: 12.06; Observed; C: 52.70; N: 3.70; H: 11.27.

**Table S1: Crystallographic data and Refinement Parameters for Complex 1-5**

| <b>Complex</b>               | <b>Complex 1</b>                                                                  | <b>Complex 2</b>                                                                  | <b>Complex 3</b>                                                                                | <b>Complex 4</b>                                                                 | <b>Complex 5</b>                                                                    |
|------------------------------|-----------------------------------------------------------------------------------|-----------------------------------------------------------------------------------|-------------------------------------------------------------------------------------------------|----------------------------------------------------------------------------------|-------------------------------------------------------------------------------------|
| <b>Empirical formula</b>     | <b>C<sub>52</sub> H<sub>34</sub> Cu<sub>2</sub> N<sub>10</sub> O<sub>10</sub></b> | <b>C<sub>78</sub> H<sub>56</sub> Cu<sub>2</sub> N<sub>10</sub> O<sub>14</sub></b> | <b>C<sub>46</sub> H<sub>34</sub> Cl<sub>2</sub> Cu<sub>2</sub> N<sub>8</sub> O<sub>12</sub></b> | <b>C<sub>48</sub> H<sub>30</sub> Cu<sub>2</sub> N<sub>8</sub> O<sub>16</sub></b> | <b>C<sub>106</sub> H<sub>104</sub> Cu<sub>5</sub> N<sub>18</sub> O<sub>30</sub></b> |
| <b>Crystal system</b>        | Triclinic                                                                         | Triclinic                                                                         | Monoclinic                                                                                      | Triclinic                                                                        | Triclinic                                                                           |
| <b>Formula weight</b>        | 1085.97                                                                           | 1484.41                                                                           | 1088.79                                                                                         | 1101.88                                                                          | 2427.77                                                                             |
| <b>Space group</b>           | <i>P</i> $\bar{1}$                                                                | <i>P</i> $\bar{1}$                                                                | <i>P</i> 21/ <i>c</i>                                                                           | <i>P</i> -1                                                                      | <i>P</i> $\bar{1}$                                                                  |
| <b>a/Å</b>                   | 7.662(3)                                                                          | 7.728(3)                                                                          | 7.4682(15)                                                                                      | 7.6549(6)                                                                        | 9.968(8)                                                                            |
| <b>b/Å</b>                   | 11.728(4)                                                                         | 15.278(5)                                                                         | 12.244(2)                                                                                       | 11.8774(10)                                                                      | 11.307(9)                                                                           |
| <b>c/Å</b>                   | 13.861(5)                                                                         | 15.982(6)                                                                         | 23.789(5)                                                                                       | 14.2863(12)                                                                      | 24.796(19)                                                                          |
| <b><math>\alpha</math>/°</b> | 66.772(5)                                                                         | 67.547(5)                                                                         | 90.00                                                                                           | 66.863(2)                                                                        | 96.56(3)                                                                            |
| <b><math>\beta</math>/°</b>  | 88.819(5)                                                                         | 88.845(5)                                                                         | 92.242(6)                                                                                       | 85.137(2)                                                                        | 90.82(3)                                                                            |
| <b><math>\gamma</math>/°</b> | 83.752(5)                                                                         | 85.603(5)                                                                         | 90.00                                                                                           | 82.646(2)                                                                        | 103.37(3)                                                                           |
| <b>V/Å<sup>3</sup></b>       | 1137.4(6)                                                                         | 1738.9(10)                                                                        | 2173.7(7)                                                                                       | 1183.77(17)                                                                      | 2699(4)                                                                             |
| <b>Reflections collected</b> | 8912                                                                              | 18521                                                                             | 31581                                                                                           | 8131                                                                             | 34099                                                                               |
| <b>unique reflections</b>    | 4391                                                                              | 5315                                                                              | 5569                                                                                            | 5315                                                                             | 10471                                                                               |
| <b>observed reflections</b>  | 2352                                                                              | 2621                                                                              | 2915                                                                                            | 2621                                                                             | 4251                                                                                |
| <b>R1</b>                    | 0.0741                                                                            | 0.0837                                                                            | 0.0610                                                                                          | 0.0573                                                                           | 0.1264                                                                              |
| <b>wR2</b>                   | 0.1948                                                                            | 0.2203                                                                            | 0.1332                                                                                          | 0.1528                                                                           | 0.3007                                                                              |
| <b>CCDC no.</b>              | 1811296                                                                           | 1937570                                                                           | 1937572                                                                                         | 1937573                                                                          | 1937571                                                                             |

**Table S2.** Selected hydrogen bonding distances (Å) and angles (deg) for the Complex2

| D-H....A                                             | Symmetry operation | D-H (Å) | A...H (Å) | D....A (Å) | <D-H-A(deg) |
|------------------------------------------------------|--------------------|---------|-----------|------------|-------------|
| C <sub>3</sub> -H <sub>3A</sub> ... O <sub>3</sub>   | x, y, z            | 0.930   | 2.437     | 2.764      | 100.58      |
| C <sub>5</sub> -H <sub>5A</sub> ... N <sub>2</sub>   | x, y, z            | 0.930   | 2.659     | 2.937      | 98.05       |
| C <sub>7</sub> -H <sub>7A</sub> ... O <sub>4</sub>   | x, y, z            | 0.930   | 2.464     | 2.783      | 100.13      |
| C <sub>1</sub> -H <sub>1AA</sub> ... O <sub>1</sub>  | x, y, z            | 0.930   | 2.546     | 3.050      | 114.35      |
| C <sub>10A</sub> -H <sub>10A</sub> ...N <sub>1</sub> | x, y, z            | 0.930   | 2.880     | 3.320      | 110.34      |
| C <sub>10A</sub> -H <sub>10A</sub> ...N <sub>2</sub> | x, y, z            | 0.930   | 2.439     | 3.195      | 138.42      |
| C <sub>10A</sub> -H <sub>10A</sub> ...O <sub>1</sub> | -x,-y+2,-z+1       | 0.930   | 2.971     | 3.488      | 116.63      |
| C <sub>10A</sub> -H <sub>10A</sub> ...N <sub>1</sub> | -x,-y+2,-z+1       | 0.930   | 2.929     | 3.087      | 90.92       |
| C <sub>14A</sub> -H <sub>14A</sub> ...O <sub>3</sub> | -x,-y+2,-z+1       | 0.930   | 2.627     | 3.133      | 114.78      |
| C <sub>1</sub> -H <sub>16A</sub> ...O <sub>2</sub>   | -x,-y+1,-z+1       | 0.930   | 2.911     | 3.684      | 141.50      |
| C <sub>18</sub> -H <sub>18A</sub> ...O <sub>3</sub>  | -x+1,-y+2,-z+1     | 0.930   | 2.768     | 3.648      | 158.24      |
| C <sub>20A</sub> -H <sub>20A</sub> ...O <sub>4</sub> | -x+1,-y+2,-z+1     | 0.930   | 2.533     | 3.344      | 145.90      |
| C <sub>21A</sub> -H <sub>21A</sub> ...O <sub>4</sub> | x,+y-1,+z+1        | 0.930   | 2.557     | 3.311      | 138.50      |

**Table S3.** Selected hydrogen bonding distances (Å) and angles (deg) for the Complex 3

| D-H....A                                               | Symmetry operation     | D-H (Å) | A...H (Å) | D....A (Å) | <D-H-A(deg) |
|--------------------------------------------------------|------------------------|---------|-----------|------------|-------------|
| C <sub>3</sub> -H <sub>3A</sub> ...O <sub>1</sub>      | x, y, z                | 0.930   | 2.524     | 2.802      | 97.54       |
| C <sub>5</sub> -H <sub>5A</sub> ...N <sub>2</sub>      | x, y, z                | 0.930   | 2.522     | 2.845      | 100.66      |
| C <sub>7</sub> -H <sub>7A</sub> ...O <sub>2</sub>      | x, y, z                | 0.930   | 2.493     | 2.800      | 99.40       |
| C <sub>1A</sub> -H <sub>1AA</sub> ...O <sub>4</sub>    | x, y, z                | 0.930   | 2.472     | 2.987      | 115.03      |
| C <sub>10A</sub> -H <sub>10A</sub> ...N <sub>1</sub>   | x, y, z                | 0.930   | 2.809     | 3.290      | 113.30      |
| C <sub>10A</sub> -H <sub>10A</sub> ...N <sub>2</sub>   | x, y, z                | 0.930   | 2.418     | 3.199      | 141.57      |
| C <sub>12A</sub> -H <sub>12C</sub> ...O <sub>1'</sub>  | x, y, z                | 0.960   | 2.628     | 3.396      | 137.24      |
| C <sub>3'</sub> -H <sub>3'A</sub> ...O <sub>1'</sub>   | x, y, z                | 0.930   | 2.530     | 2.802      | 97.17       |
| C <sub>5'</sub> -H <sub>5'A</sub> ...N <sub>2'</sub>   | x, y, z                | 0.930   | 2.541     | 2.855      | 100.13      |
| C <sub>7'</sub> -H <sub>7'A</sub> ...O <sub>2'</sub>   | x, y, z                | 0.930   | 2.463     | 2.776      | 99.77       |
| C <sub>1A'</sub> -H <sub>1AB</sub> ...O <sub>4'</sub>  | x, y, z                | 0.930   | 2.522     | 3.045      | 115.90      |
| C <sub>10''</sub> -H <sub>10B</sub> ...N <sub>1'</sub> | x, y, z                | 0.930   | 2.803     | 3.278      | 112.89      |
| C <sub>10''</sub> -H <sub>10B</sub> ...N <sub>2'</sub> | x, y, z                | 0.930   | 2.356     | 3.133      | 140.94      |
| C <sub>12''</sub> -H <sub>12F</sub> ...O <sub>2</sub>  | x, y, z                | 0.960   | 2.597     | 3.515      | 160.09      |
| C <sub>9</sub> -H <sub>9A</sub> ...O <sub>2'</sub>     | x-1/2,-y+1/2,+z+1/2    | 0.930   | 2.720     | 3.396      | 130.27      |
| C <sub>11A</sub> -H <sub>11B</sub> ...O <sub>3'</sub>  | x+1,+y,+z              | 0.960   | 2.636     | 3.593      | 174.51      |
| C <sub>11A</sub> -H <sub>11B</sub> ...O <sub>4'</sub>  | x+1,+y,+z              | 0.960   | 2.842     | 3.519      | 128.35      |
| C <sub>12A</sub> -H <sub>12B</sub> ...O <sub>1</sub>   | -x+1,-y+1,-z+2         | 0.960   | 2.589     | 3.533      | 167.49      |
| C <sub>12A</sub> -H <sub>12C</sub> ...O <sub>3</sub>   | x+1/2,-y+1/2,+z-1/2    | 0.960   | 2.904     | 3.749      | 147.49      |
| C <sub>9'</sub> -H <sub>9'A</sub> ...O <sub>2</sub>    | x+1/2,-y+1/2,+z-1/2    | 0.930   | 2.851     | 3.525      | 130.29      |
| C <sub>4'</sub> -H <sub>4'A</sub> ...O <sub>1</sub>    | -x,-y+1,-z+2           | 0.930   | 2.552     | 3.304      | 138.23      |
| C <sub>4'</sub> -H <sub>4'A</sub> ...O <sub>3'</sub>   | -x+1/2,+y+1/2,+z+1/2+1 | 0.930   | 2.885     | 3.523      | 126.89      |
| C <sub>2A'</sub> -H <sub>2AB</sub> ...O <sub>1'</sub>  | -x+1/2,+y-1/2,-z+1/2+1 | 0.930   | 2.534     | 3.055      | 115.72      |
| C <sub>1A'</sub> -H <sub>1AB</sub> ...O <sub>1'</sub>  | -x+1/2,+y-1/2,-z+1/2+1 | 0.930   | 2.428     | 3.011      | 120.72      |
| C <sub>11''</sub> -H <sub>11D</sub> ...O <sub>4</sub>  | -x,-y,-z+2             | 0.960   | 2.869     | 3.789      | 160.80      |
| C <sub>11''</sub> -H <sub>11F</sub> ...O <sub>3'</sub> | -x,-y,-z+2             | 0.960   | 2.656     | 3.395      | 134.14      |
| C <sub>2A''</sub> -H <sub>2AB</sub> ...O <sub>3</sub>  | -x,-y,-z+2             | 0.930   | 2.665     | 3.569      | 164.39      |
| C <sub>12''</sub> -H <sub>12E</sub> ...N <sub>2</sub>  | x-1,+y,+z              | 0.960   | 2.657     | 3.429      | 137.75      |

**Table S4.** Selected hydrogen bonding distances (Å) and angles (deg) for the **Complex 4**

| D-H...A                                              | Symmetry operation | D-H (Å) | A...H (Å) | D...A (Å) | <D-H-A(deg) |
|------------------------------------------------------|--------------------|---------|-----------|-----------|-------------|
| C <sub>3</sub> -H <sub>3A</sub> ...O <sub>1</sub>    | x, y, z            | 0.930   | 2.616     | 2.876     | 96.63       |
| C <sub>5</sub> -H <sub>5A</sub> ...N <sub>2</sub>    | x, y, z            | 0.930   | 2.725     | 2.960     | 95.33       |
| C <sub>7</sub> -H <sub>7A</sub> ...O <sub>2</sub>    | x, y, z            | 0.930   | 2.369     | 2.704     | 100.90      |
| C <sub>1A</sub> -H <sub>1AA</sub> ...O <sub>2W</sub> | x, y, z            | 0.930   | 2.850     | 3.762     | 167.10      |
| C <sub>2A</sub> -H <sub>2AA</sub> ...O <sub>1W</sub> | x, y, z            | 0.930   | 2.850     | 3.723     | 156.76      |
| C <sub>3A</sub> -H <sub>3AA</sub> ...Cl <sub>1</sub> | x, y, z            | 0.930   | 2.717     | 3.089     | 104.86      |
| C <sub>3</sub> -H <sub>3A</sub> ...O <sub>2W</sub>   | -x+1,+y-1/2,-z+1/2 | 0.930   | 2.644     | 3.499     | 153.21      |
| O <sub>2</sub> -H <sub>2</sub> ...O <sub>1W</sub>    | -x+1,+y-1/2,-z+1/2 | 0.901   | 1.646     | 2.537     | 169.48      |
| O <sub>1W</sub> -H <sub>1WA</sub> ...O <sub>2W</sub> | -x+1,+y-1/2,-z+1/2 | 0.965   | 1.720     | 2.668     | 166.59      |
| C <sub>1A</sub> -H <sub>1AA</sub> ...O <sub>1</sub>  | -x+1,+y+1/2,-z+1/2 | 0.930   | 2.994     | 3.697     | 133.61      |
| O <sub>2W</sub> -H <sub>2WB</sub> ...O <sub>1</sub>  | -x+1,+y+1/2,-z+1/2 | 1.042   | 1.822     | 2.796     | 153.84      |
| C <sub>10A</sub> -H <sub>10A</sub> ...N <sub>2</sub> | -x+2,-y+1,-z+1     | 0.930   | 2.537     | 3.279     | 137.03      |
| C <sub>1A</sub> -H <sub>1AA</sub> ...O <sub>3</sub>  | -x+2,-y+1,-z+1     | 0.930   | 2.579     | 3.028     | 110.18      |
| O <sub>2W</sub> -H <sub>2WA</sub> ...O <sub>3</sub>  | -x+2,-y+1,-z+1     | 0.921   | 1.936     | 2.842     | 167.05      |
| O <sub>2W</sub> -H <sub>2WA</sub> ...O <sub>4</sub>  | -x+2,-y+1,-z+1     | 0.921   | 2.785     | 3.545     | 140.54      |
| C <sub>10A</sub> -H <sub>10A</sub> ...N <sub>1</sub> | -x+2,-y+1,-z+1     | 0.930   | 2.936     | 3.363     | 109.50      |
| C <sub>3A</sub> -H <sub>3AA</sub> ...O <sub>4</sub>  | x,-y+1/2,+z-1/2    | 0.930   | 2.809     | 3.282     | 112.67      |
| O <sub>1W</sub> -H <sub>1WB</sub> ...O <sub>4</sub>  | x,-y+1/2,+z-1/2    | 0.866   | 1.827     | 2.673     | 165.06      |
| C <sub>2A</sub> -H <sub>2AA</sub> ...O <sub>4</sub>  | x,-y+1/2,+z-1/2    | 0.930   | 2.557     | 3.156     | 122.51      |
| C <sub>9A</sub> -H <sub>9AA</sub> ...O <sub>1W</sub> | x+1,-y+1/2,+z+1/2  | 0.930   | 2.542     | 3.441     | 162.53      |

**Table S5.** Selected hydrogen bonding distances (Å) and angles (deg) for the **Complex 5**

| D-H...A                                            | Symmetry operation | D-H (Å) | A...H (Å) | D...A (Å) | <D-H-A(deg) |
|----------------------------------------------------|--------------------|---------|-----------|-----------|-------------|
| C <sub>23</sub> -H <sub>23</sub> ...O <sub>3</sub> | x, y, z            | 0.95    | 2.480     | 2.784     | 98.49       |
| C <sub>9</sub> -H <sub>9</sub> ...O <sub>1</sub>   | x, y, z            | 0.95    | 2.673     | 3.144     | 111.19      |
| C <sub>13</sub> -H <sub>13</sub> ...N <sub>4</sub> | x, y, z            | 0.95    | 2.837     | 3.303     | 111.30      |
| C <sub>21</sub> -H <sub>21</sub> ...O <sub>4</sub> | x, y, z            | 0.95    | 2.449     | 2.754     | 98.45       |
| C <sub>12</sub> -H <sub>12</sub> ...O <sub>5</sub> | x, y, z            | 0.95    | 2.494     | 3.412     | 162.33      |
| O <sub>4</sub> -H <sub>5A</sub> ...O <sub>7</sub>  | x, +y, +z-1        | 0.84    | 1.741     | 2.555     | 162.48      |
| C <sub>9</sub> -H <sub>9</sub> ...O <sub>8</sub>   | x+1, +y, +z        | 0.95    | 2.805     | 3.743     | 169.64      |
| C <sub>19</sub> -H <sub>19</sub> ...N <sub>3</sub> | -x+1, -y+1,-z+1    | 0.95    | 2.904     | 3.329     | 108.40      |
| C <sub>10</sub> -H <sub>10</sub> ...O <sub>4</sub> | x+1, +y, -z+1      | 0.95    | 2.702     | 3.627     | 164.96      |
| C <sub>5</sub> -H <sub>5</sub> ...O <sub>2</sub>   | x, +y+1, +z        | 0.95    | 2.774     | 3.470     | 130.86      |
| C <sub>1</sub> -H <sub>1C</sub> ...O <sub>3</sub>  | -x+2, -y+1, -z+1   | 0.98    | 2.867     | 3.673     | 140.13      |
| C <sub>1</sub> -H <sub>1C</sub> ...O <sub>6</sub>  | -x+2, -y+1, -z+2   | 0.98    | 2.706     | 3.165     | 109.12      |

**Table S6** Selected Bond angle & Bond length of Complex 2

| <b>Bond angle (°)</b>                            |                 |                                                   |                 | <b>Bond length (Å)</b>          |                 |
|--------------------------------------------------|-----------------|---------------------------------------------------|-----------------|---------------------------------|-----------------|
| N <sub>1</sub> -Cu <sub>1</sub> -O <sub>1</sub>  | <b>83.3(2)</b>  | N <sub>1</sub> -Cu <sub>1</sub> -N <sub>2A</sub>  | <b>98.8(2)</b>  | Cu <sub>1</sub> N <sub>1</sub>  | <b>1.932(6)</b> |
| N <sub>1</sub> -Cu <sub>1</sub> -N <sub>1A</sub> | <b>168.5(2)</b> | O <sub>1</sub> -Cu <sub>1</sub> -N <sub>2A</sub>  | <b>166.7(2)</b> | Cu <sub>1</sub> O <sub>1</sub>  | <b>1.976(5)</b> |
| O <sub>1</sub> -Cu <sub>1</sub> -N <sub>1A</sub> | <b>93.0(2)</b>  | N <sub>1A</sub> -Cu <sub>1</sub> -N <sub>2A</sub> | <b>82.4(2)</b>  | Cu <sub>1</sub> N <sub>1A</sub> | <b>1.989(6)</b> |
|                                                  |                 |                                                   |                 | Cu <sub>1</sub> N <sub>2A</sub> | <b>2.009(6)</b> |

**Table S7** Selected Bond angle & Bond length of Complex 3

| <b>Bond angle (°)</b>                             |                 |                                                   |                 | <b>Bond length (Å)</b>          |                  |
|---------------------------------------------------|-----------------|---------------------------------------------------|-----------------|---------------------------------|------------------|
| N <sub>1</sub> -Cu <sub>1</sub> -N <sub>1A</sub>  | <b>160.8(4)</b> | O <sub>2</sub> -Cu <sub>1</sub> -N <sub>1'</sub>  | <b>167.4(4)</b> | Cu <sub>1</sub> N <sub>1</sub>  | <b>1.972(10)</b> |
| N <sub>1</sub> -Cu <sub>1</sub> -O <sub>2</sub>   | <b>80.7(3)</b>  | N <sub>1</sub> -Cu <sub>1</sub> -N <sub>2A</sub>  | <b>112.1(4)</b> | Cu <sub>1</sub> N <sub>1A</sub> | <b>2.006(9)</b>  |
| N <sub>1A</sub> -Cu <sub>1</sub> -O <sub>2</sub>  | <b>84.6(3)</b>  | N <sub>1A</sub> -Cu <sub>1</sub> -N <sub>2A</sub> | <b>80.4(4)</b>  | Cu <sub>1</sub> O <sub>2</sub>  | <b>2.015(8)</b>  |
| N <sub>1</sub> -Cu <sub>1</sub> -N <sub>1'</sub>  | <b>96.8(3)</b>  | O <sub>2</sub> -Cu <sub>1</sub> -N <sub>2A</sub>  | <b>90.6(3)</b>  | Cu <sub>1</sub> N <sub>1'</sub> | <b>2.028(10)</b> |
| N <sub>1A</sub> -Cu <sub>1</sub> -N <sub>1'</sub> | <b>94.8(4)</b>  | N <sub>1'</sub> -Cu <sub>1</sub> -N <sub>2A</sub> | <b>101.8(4)</b> | Cu <sub>1</sub> N <sub>2A</sub> | <b>2.235(10)</b> |

**Table S9** Selected Bond angle & Bond length of Complex 4

| <b>Bond angle (°)</b>                            |                   |                                                   |                   | <b>Bond length (Å)</b>          |                 |
|--------------------------------------------------|-------------------|---------------------------------------------------|-------------------|---------------------------------|-----------------|
| N <sub>1</sub> -Cu <sub>1</sub> -O <sub>3</sub>  | <b>82.32(12)</b>  | N <sub>1A</sub> -Cu <sub>1</sub> -N <sub>2A</sub> | <b>81.58(13)</b>  | Cu <sub>1</sub> N <sub>1</sub>  | <b>1.939(3)</b> |
| N <sub>1</sub> -Cu <sub>1</sub> -N <sub>1A</sub> | <b>164.74(13)</b> | N <sub>1</sub> -Cu <sub>1</sub> -N <sub>2</sub>   | <b>95.71(12)</b>  | Cu <sub>1</sub> O <sub>3</sub>  | <b>1.978(3)</b> |
| O <sub>3</sub> -Cu <sub>1</sub> -N <sub>1A</sub> | <b>91.09(12)</b>  | O <sub>3</sub> -Cu <sub>1</sub> -N <sub>2</sub>   | <b>109.32(12)</b> | Cu <sub>1</sub> N <sub>1A</sub> | <b>1.992(3)</b> |
| N <sub>1</sub> -Cu <sub>1</sub> -N <sub>2A</sub> | <b>99.52(13)</b>  | N <sub>1A</sub> -Cu <sub>1</sub> -N <sub>2</sub>  | <b>99.46(12)</b>  | Cu <sub>1</sub> N <sub>2A</sub> | <b>2.026(3)</b> |
| O <sub>3</sub> -Cu <sub>1</sub> -N <sub>2A</sub> | <b>158.13(13)</b> | N <sub>2A</sub> -Cu <sub>1</sub> -N <sub>2</sub>  | <b>92.25(12)</b>  | Cu <sub>1</sub> N <sub>2</sub>  | <b>2.352(3)</b> |

**Table S10** Selected Bond angle & Bond length of Complex 5

| <b>Bond angle (°)</b>                         |                   |                                               |                   | <b>Bond length (Å)</b>         |                 |
|-----------------------------------------------|-------------------|-----------------------------------------------|-------------------|--------------------------------|-----------------|
| N <sub>2</sub> Cu <sub>1</sub> N <sub>4</sub> | <b>168.15(18)</b> | O <sub>1</sub> Cu <sub>1</sub> N <sub>3</sub> | <b>160.34(17)</b> | Cu <sub>1</sub> N <sub>2</sub> | <b>1.941(4)</b> |
| N <sub>2</sub> Cu <sub>1</sub> O <sub>1</sub> | <b>81.77(17)</b>  | N <sub>2</sub> Cu <sub>1</sub> N <sub>1</sub> | <b>94.67(16)</b>  | Cu <sub>1</sub> N <sub>4</sub> | <b>1.995(5)</b> |
| N <sub>4</sub> Cu <sub>1</sub> O <sub>1</sub> | <b>94.21(18)</b>  | N <sub>4</sub> Cu <sub>1</sub> N <sub>1</sub> | <b>97.18(16)</b>  | Cu <sub>1</sub> O <sub>1</sub> | <b>1.996(4)</b> |
| N <sub>2</sub> Cu <sub>1</sub> N <sub>3</sub> | <b>98.67(19)</b>  | O <sub>1</sub> Cu <sub>1</sub> N <sub>1</sub> | <b>109.87(16)</b> | Cu <sub>1</sub> N <sub>3</sub> | <b>2.027(5)</b> |
| N <sub>4</sub> Cu <sub>1</sub> N <sub>3</sub> | <b>81.38(19)</b>  | N <sub>3</sub> Cu <sub>1</sub> N <sub>1</sub> | <b>89.72(17)</b>  | Cu <sub>1</sub> N <sub>1</sub> | <b>2.376(4)</b> |

**Table S11: The Cu-N<sub>axial</sub> distances and magnetic nature of complex 1-5**

| Complex | Distance (Cu-N <sub>ax</sub> )<br>in Å | Observed J value (cm <sup>-1</sup> ) | Magnetic nature   |
|---------|----------------------------------------|--------------------------------------|-------------------|
| 1       | 2.409(5)                               | +1.41                                | Ferromagnetic     |
| 2       | 2.513(7)                               | +15.3                                | Ferromagnetic     |
| 3       | 2.353 (3)                              | -6.4                                 | Antiferromagnetic |
| 4       | 2.376(4)                               | +5.4                                 | Ferromagnetic     |
| 5       | 2.23(1)<br>2.21(1)                     | -68                                  | Antiferromagnetic |

**Table S12: Torsion angle (50°- 120°) dependent magnetic exchange of copper compounds.**

| Compound<br>(CSD REFCODE)                                                                                                    | Magnetic study<br>(J value)                         | Torsion<br>angle( $\tau$ ) | References                                                    |
|------------------------------------------------------------------------------------------------------------------------------|-----------------------------------------------------|----------------------------|---------------------------------------------------------------|
| C <sub>34</sub> H <sub>22</sub> Cu <sub>2</sub> N <sub>8</sub> O <sub>5</sub><br>(POVPUN)                                    | Ferromagnetic<br>+15 cm <sup>-1</sup>               | 69.52°, 75.28°             | <i>Eur.J.Inorg.Chem.</i> 2014, <b>34</b> ,5874–5884           |
| C <sub>92</sub> H <sub>80</sub> Cu <sub>2</sub> N <sub>8</sub><br>(OLIWAI)                                                   | Ferromagnetic<br>+16.3 cm <sup>-1</sup>             | 78.90°, 80.16°             | <i>Angew. Chem. Int. Ed.</i> , 2011,<br><b>50</b> ,1420 –1424 |
| C <sub>118</sub> H <sub>120</sub> B <sub>2</sub> Cu <sub>2</sub> F <sub>8</sub> N <sub>8</sub><br>O <sub>4</sub><br>(DOFRIB) | Ferromagnetic<br>+67 cm <sup>-1</sup><br>(From DFT) | 74.82°, 84.71°             | <i>J. Am. Chem. Soc.</i> 2013, <b>135</b> ,<br>13892–13899    |
| C <sub>38</sub> H <sub>70</sub> C <sub>16</sub> Cu <sub>2</sub> N <sub>8</sub> O <sub>12</sub><br>(JOBUCO)                   | Antiferromagnetic<br>-300 cm <sup>-1</sup>          | 4.3° – 58.55°              | <i>Inorg. Chem.</i> 2014, <b>53</b> , 3290–3297               |
| C <sub>239</sub> H <sub>165</sub> Cu <sub>16</sub> N <sub>51</sub> O <sub>19</sub><br>(JOBUCO)                               | Magnetic study was<br>not reported.                 | 16.3°-51.2°                | <i>Inorg. Chem.</i> 2014, <b>53</b> , 3290–3297               |
| C <sub>35</sub> H <sub>64</sub> C <sub>16</sub> Cu <sub>2</sub> N <sub>8</sub> O <sub>11</sub><br>(ADIMAB)                   | Magnetic study was<br>not reported.                 | 54.88-63.41                | <i>Chem. Eur. J.</i> 2002, <b>8(1)</b> , 247-258              |

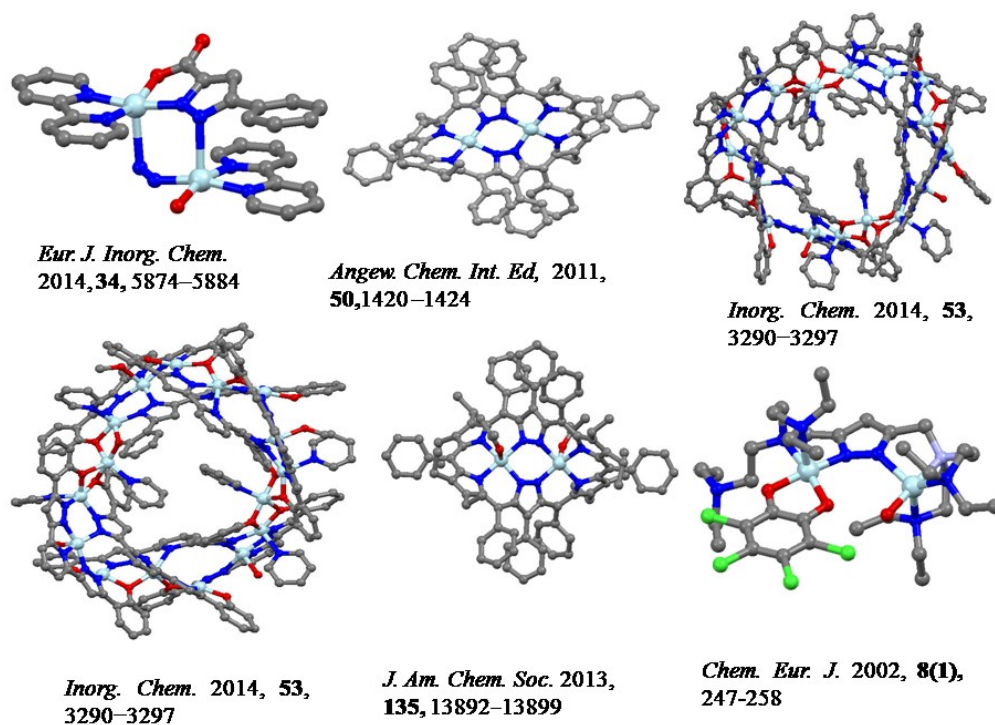

**Figure S1.** Structure of the all copper compounds having torsion angle in the range 50°-120° from CSD search.

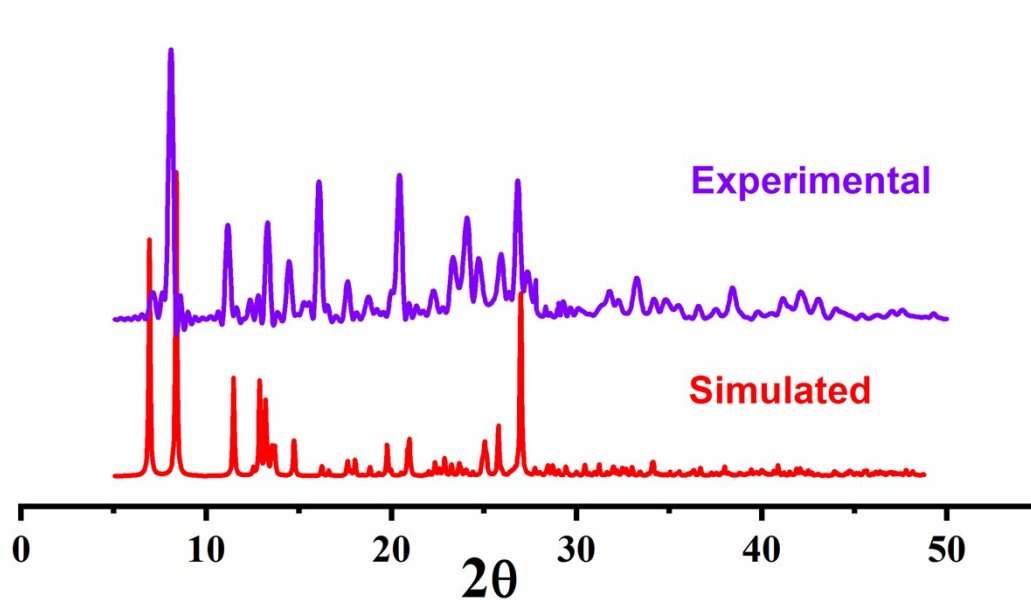

**Figure S2:** Powder pattern of complex 1.



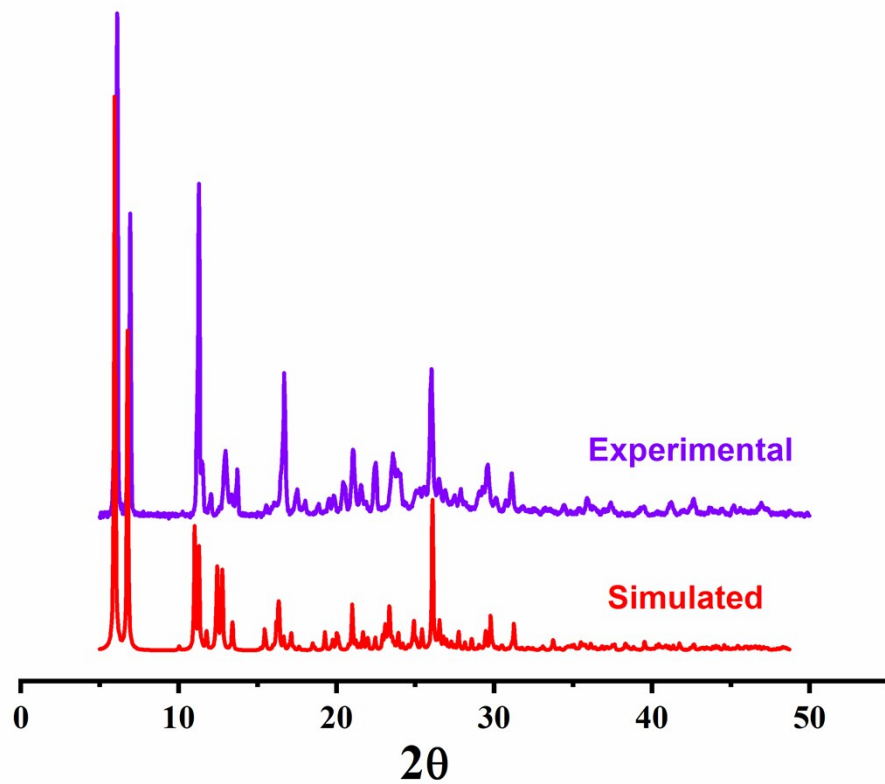

**Figure S3:** Powder pattern of complex 2.

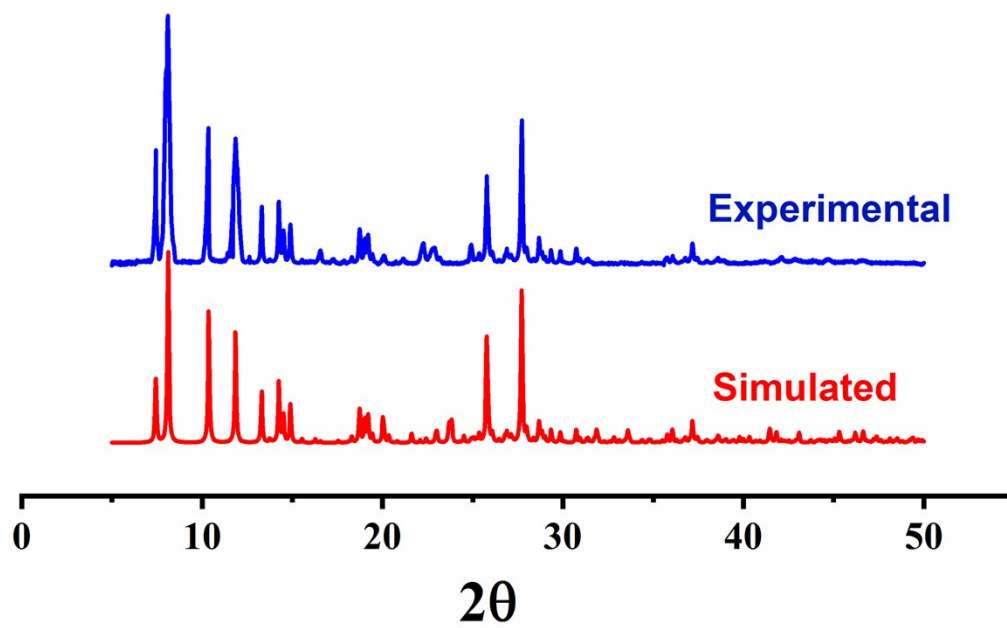

**Figure S4:** Powder pattern of complex 3.

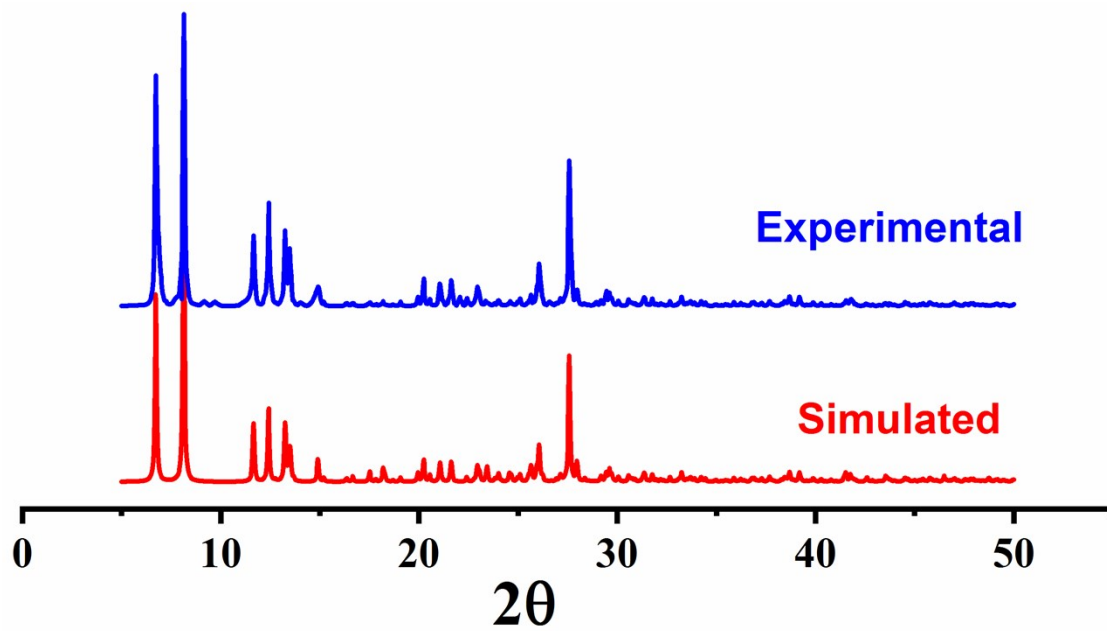

Figure S5: Powder pattern of complex 4.

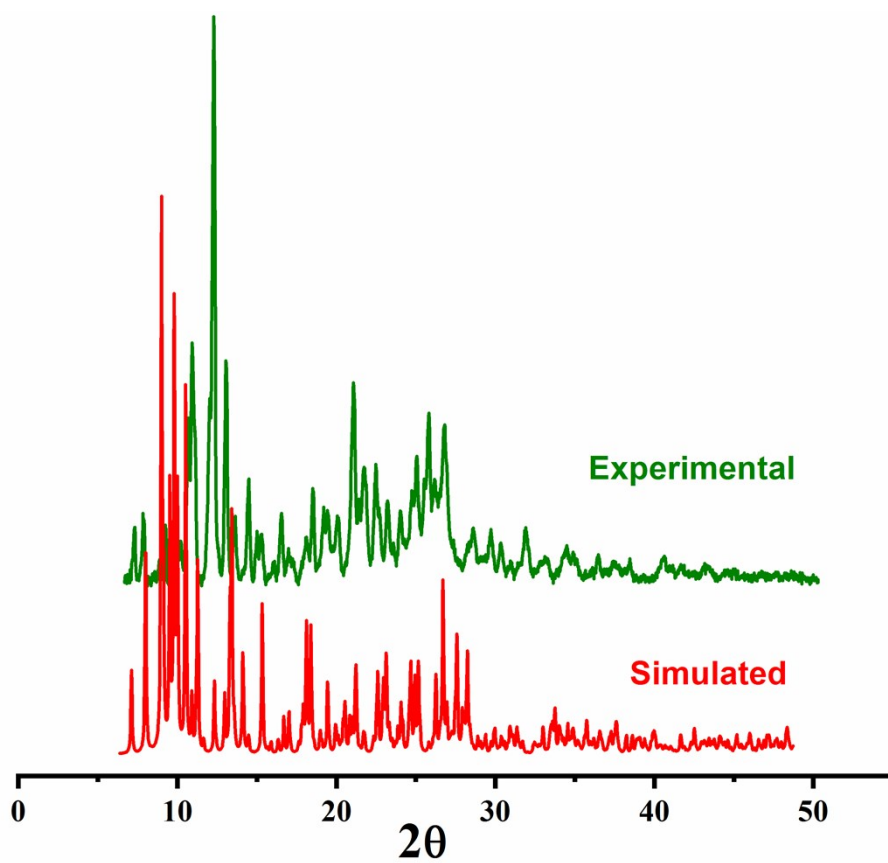

Figure S6: Powder pattern of complex 5.

**Interatomic (Cu-Cu) distance and H-bonding pattern of complex 1-5:**

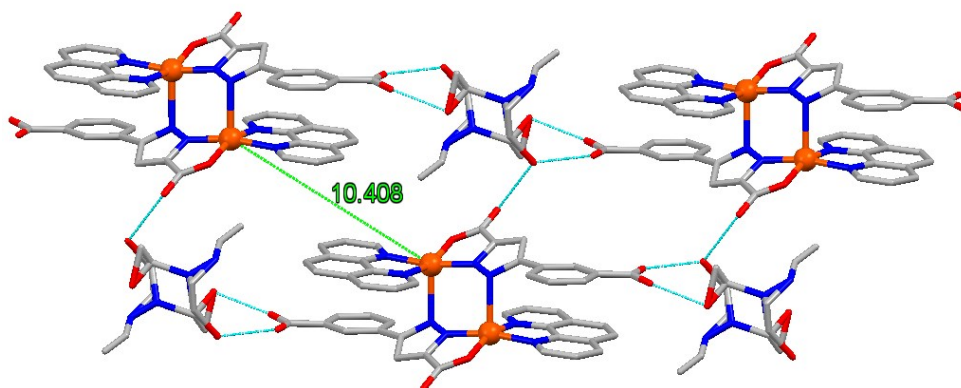

**Figure S7:** Interatomic (Cu-Cu) distance of Complex 1.

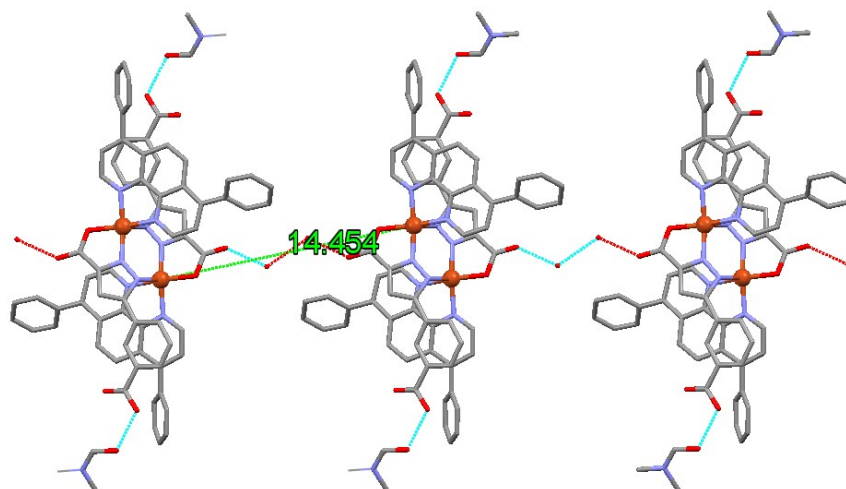

**Figure S8:** Interatomic (Cu-Cu) distance of Complex 2.

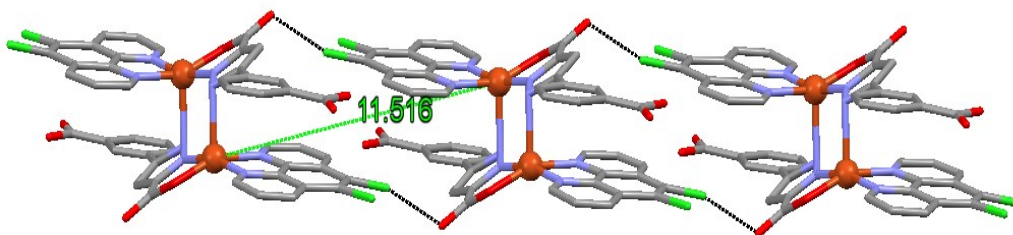

**Figure S9:** Interatomic (Cu-Cu) distance of Complex 3.

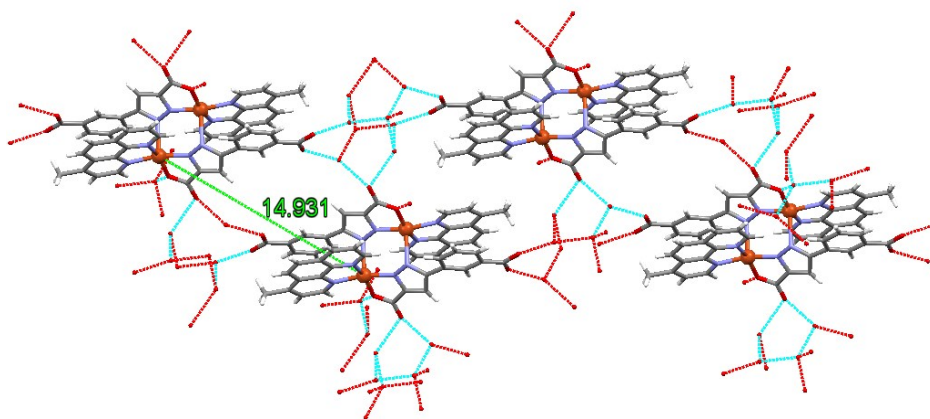

**Figure S10:** Interatomic (Cu-Cu) distance of Complex 4.

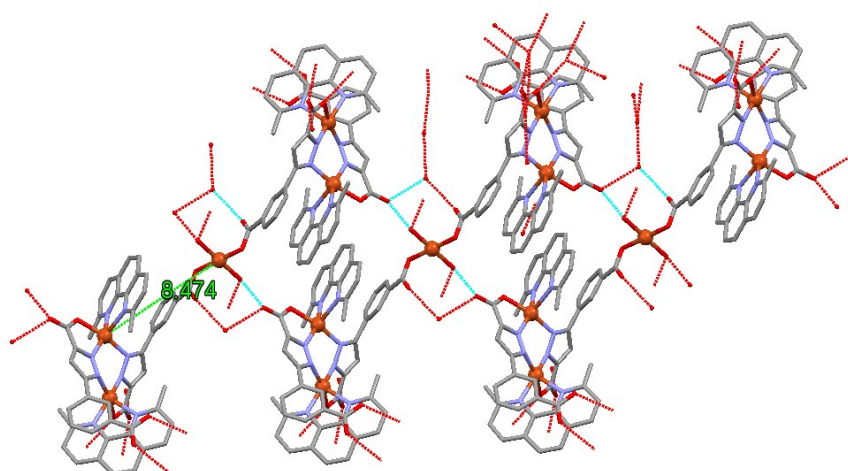

**Figure S11:** Interatomic (Cu-Cu) distance of Complex 5.

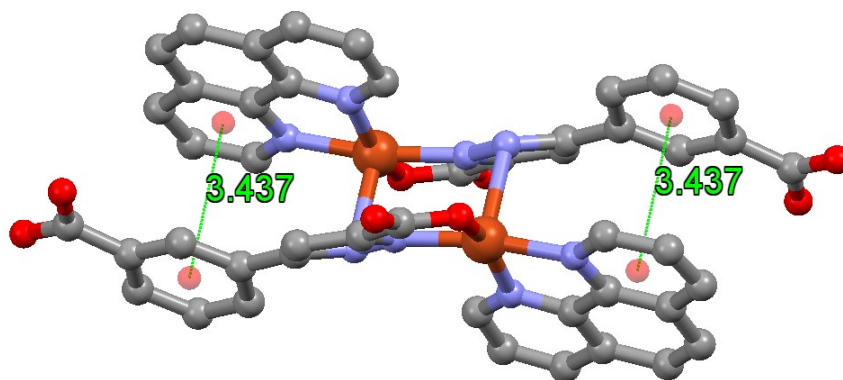

**Figure S12:** Representation of  $\pi$ - $\pi$  stacking of complex 1.

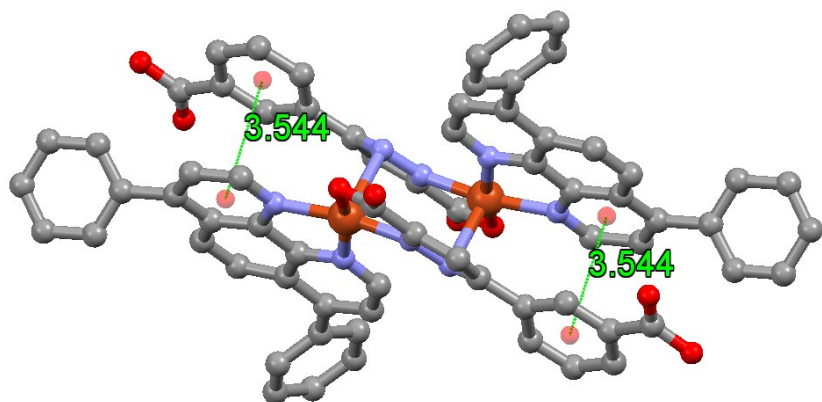

Figure S13: Representation of  $\pi$ - $\pi$  stacking of complex 2.

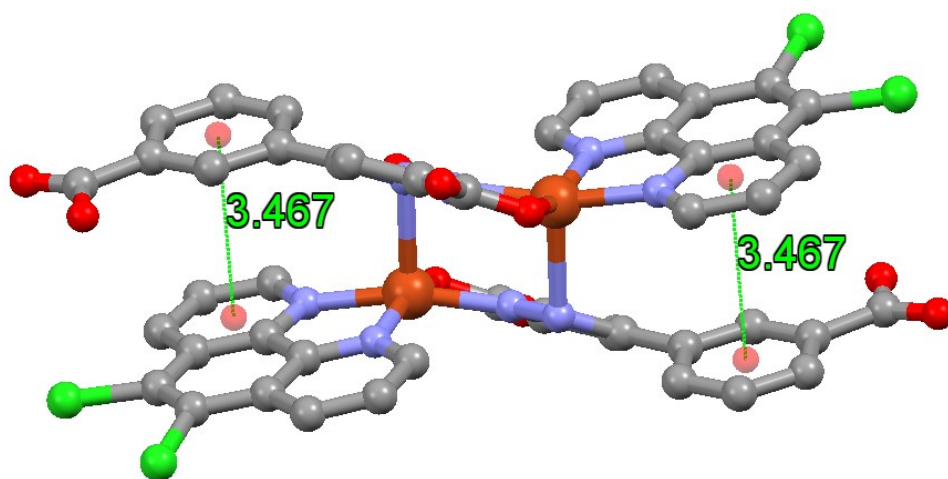

Figure S14: Representation of  $\pi$ - $\pi$  stacking of complex 3.

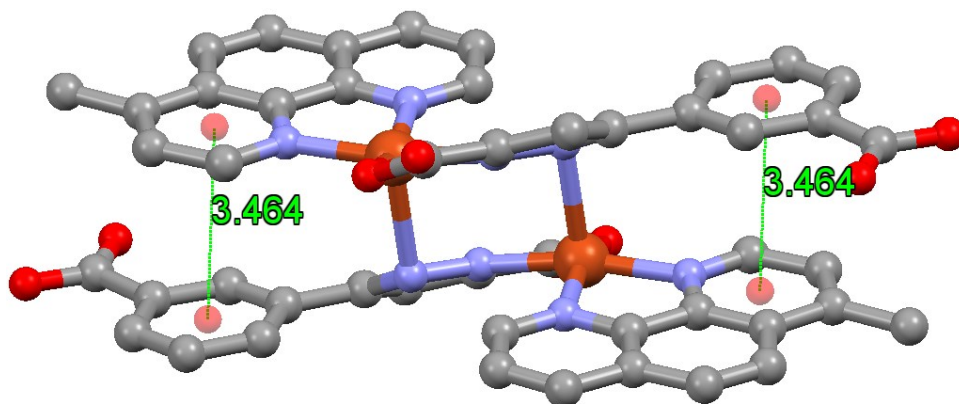

Figure S15: Representation of  $\pi$ - $\pi$  stacking of complex 4.

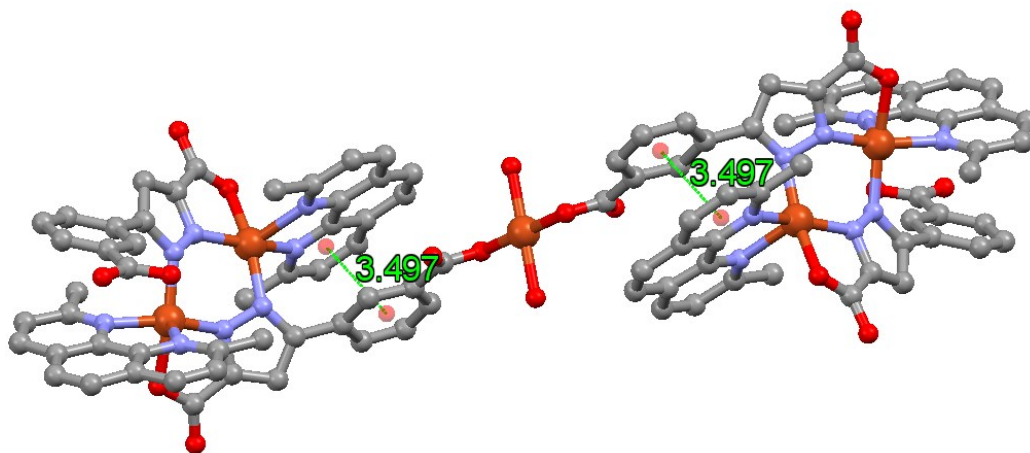

**Figure S16:** Representation of  $\pi$ - $\pi$  stacking of complex 5.

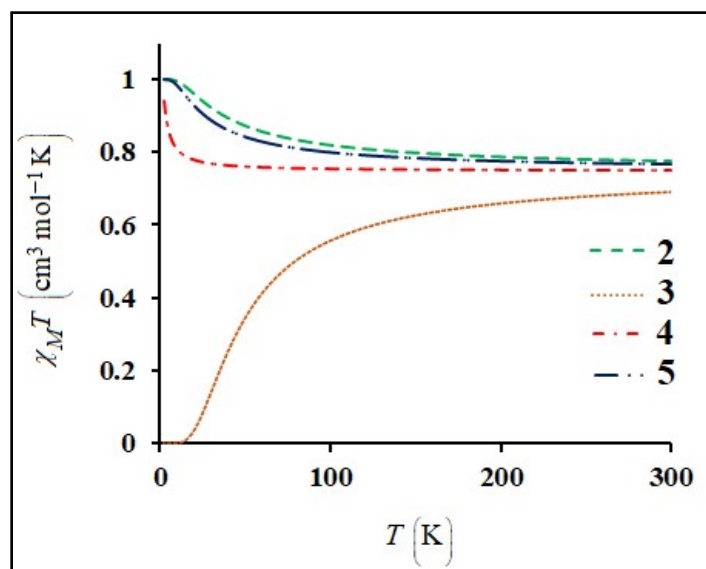

**Figure S17.** Computationally calculated molar magnetic susceptibility ( $\chi_M$ ) at different temperatures.

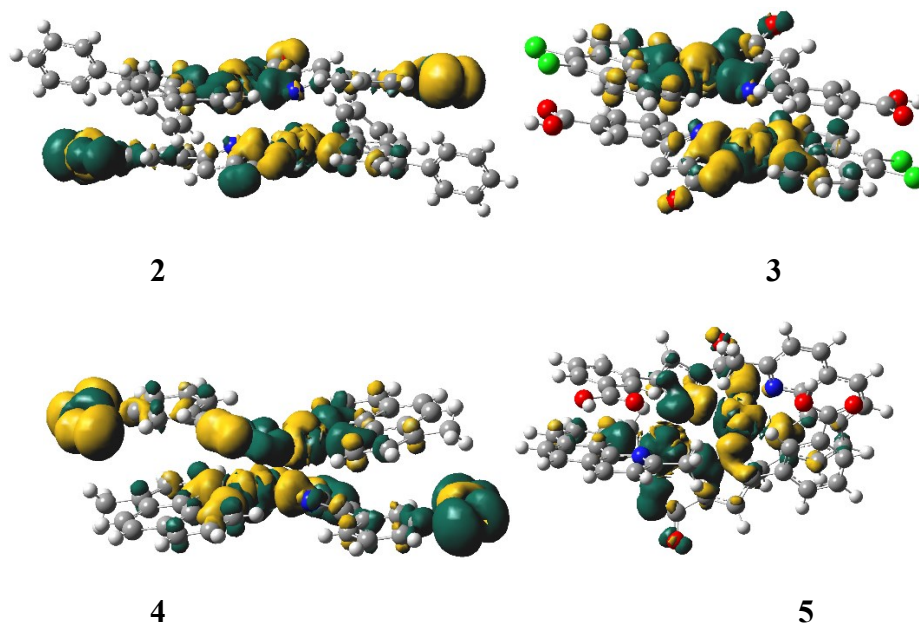

**Figure S18.** Spin density plots at broken symmetry state. The isovalues are of  $\pm 0.002$  a.u. Green refers the positive density while the yellow refers the negative density.

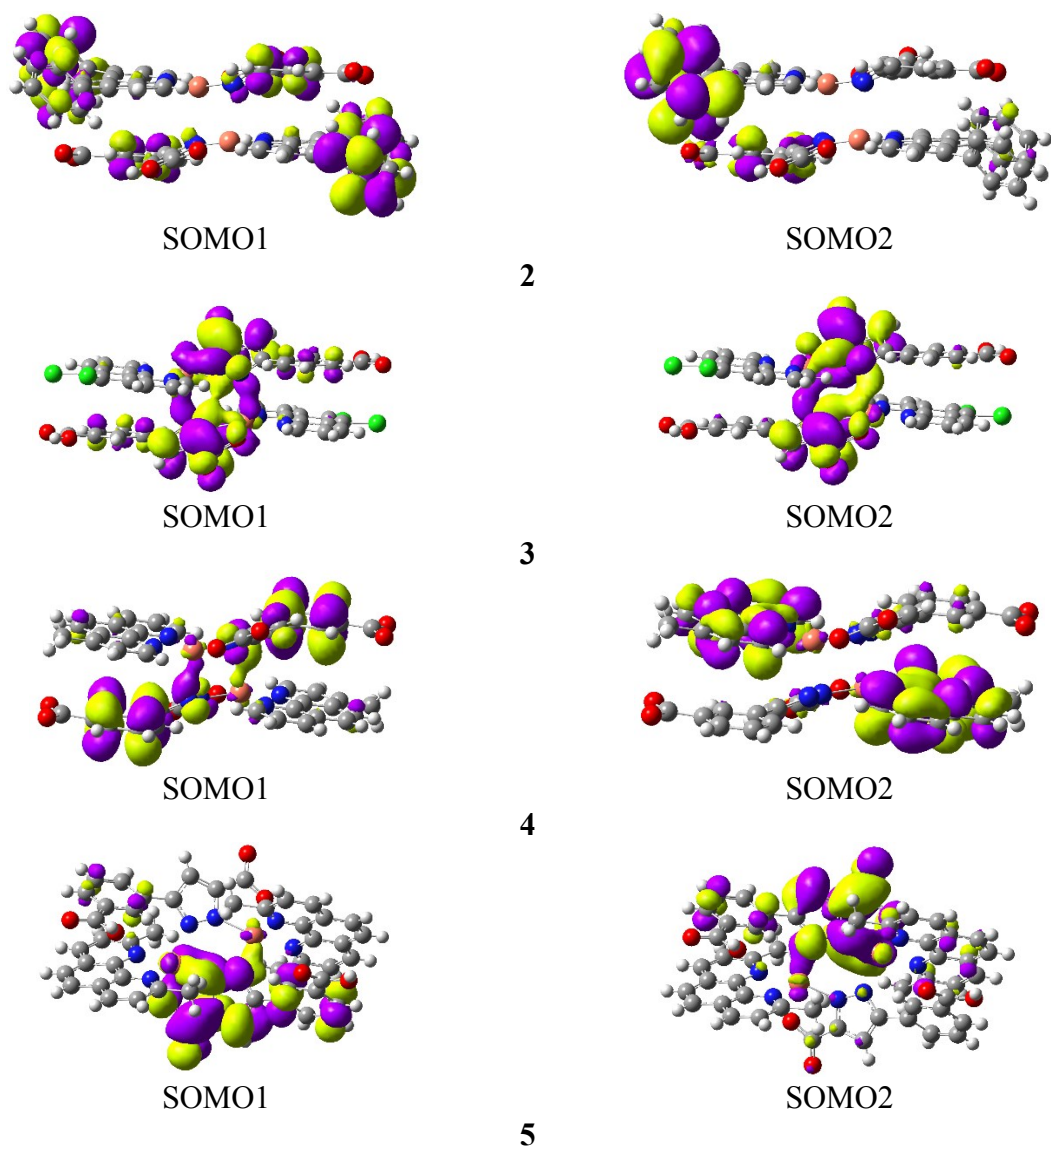

**Figure S19.** The singly occupied molecular orbitals (SOMOs) with isovalues of  $\pm 0.03$  a.u. The purple color indicates the positive sign whereas yellow color refers negative sign.
